# Supplementary material for: Mitochondria-Targeted Triphenylphosphonium-Hydroxytyrosol Prevents Lipotoxicity-Induced Endothelial Injury by Enhancing Mitochondrial Function and Redox Balance via Promoting FoxO1 and Nrf2 Nuclear Translocation and Suppressing Inflammation via Inhibiting p38/NF-кB Pathway
Source: MDPI journal article supplement (doi:10.3390/antiox12010175), 2023-01-11
Supplement: s1 [file s1]

**Supplementary Table 1 Primers**

| Species | Gene  | Gene ID | Primer (5'-3')                                                   |
|---------|-------|---------|------------------------------------------------------------------|
| Human   | ACTIN | 60      | Forward: ATCATGTTTGAGACCTTCAA<br>Reverse: AGATGGGCACAGTGTGGGT    |
| Human   | IL-6  | 3569    | Forward: TTTTGTACTCATCTGCACAGC<br>Reverse: GGATTCAATGAGGAGACTTGC |
| Human   | MMP-1 | 4312    | Forward: ACGCCAGATTTGCCAAGAG<br>Reverse: TTGACCCTCAGAGACCTTGGT   |

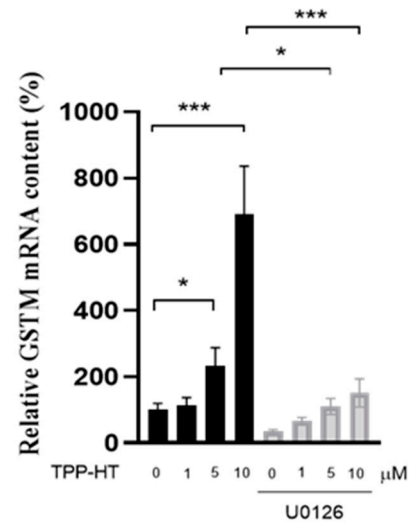

Figure S1 **TPP-HT pretreatment contributes to antioxidant responses via activating Erk signaling pathway.** HAECs were treated with or without TPP-HT (1, 5, 10 μM) for 24 h in the presence of Erk inhibitor U0126 (10 μM) pretreatment. mRNA level of GSTM. \*p < 0.05, \*\*\*p < 0.001.

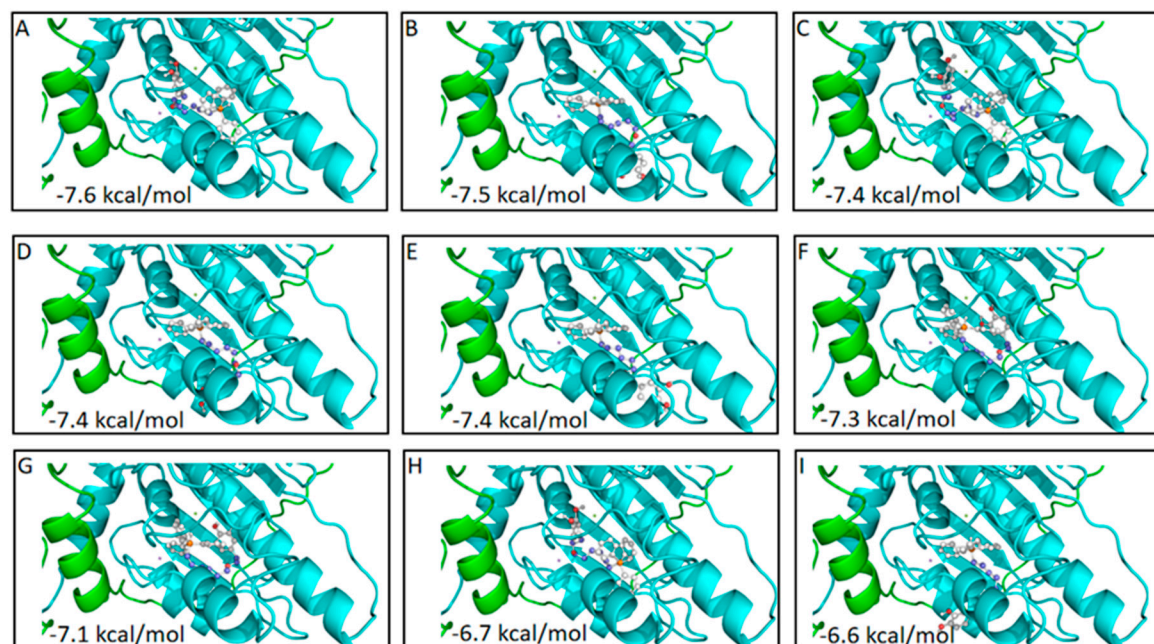

Figure S2 **TPP-HT may target mitochondrial ETC complex II**. Analysis of ligand (TPP-HT) binding energy in the protein SDHB (mitochondrial respiratory chain complex II) (PDB code: 7KCM)

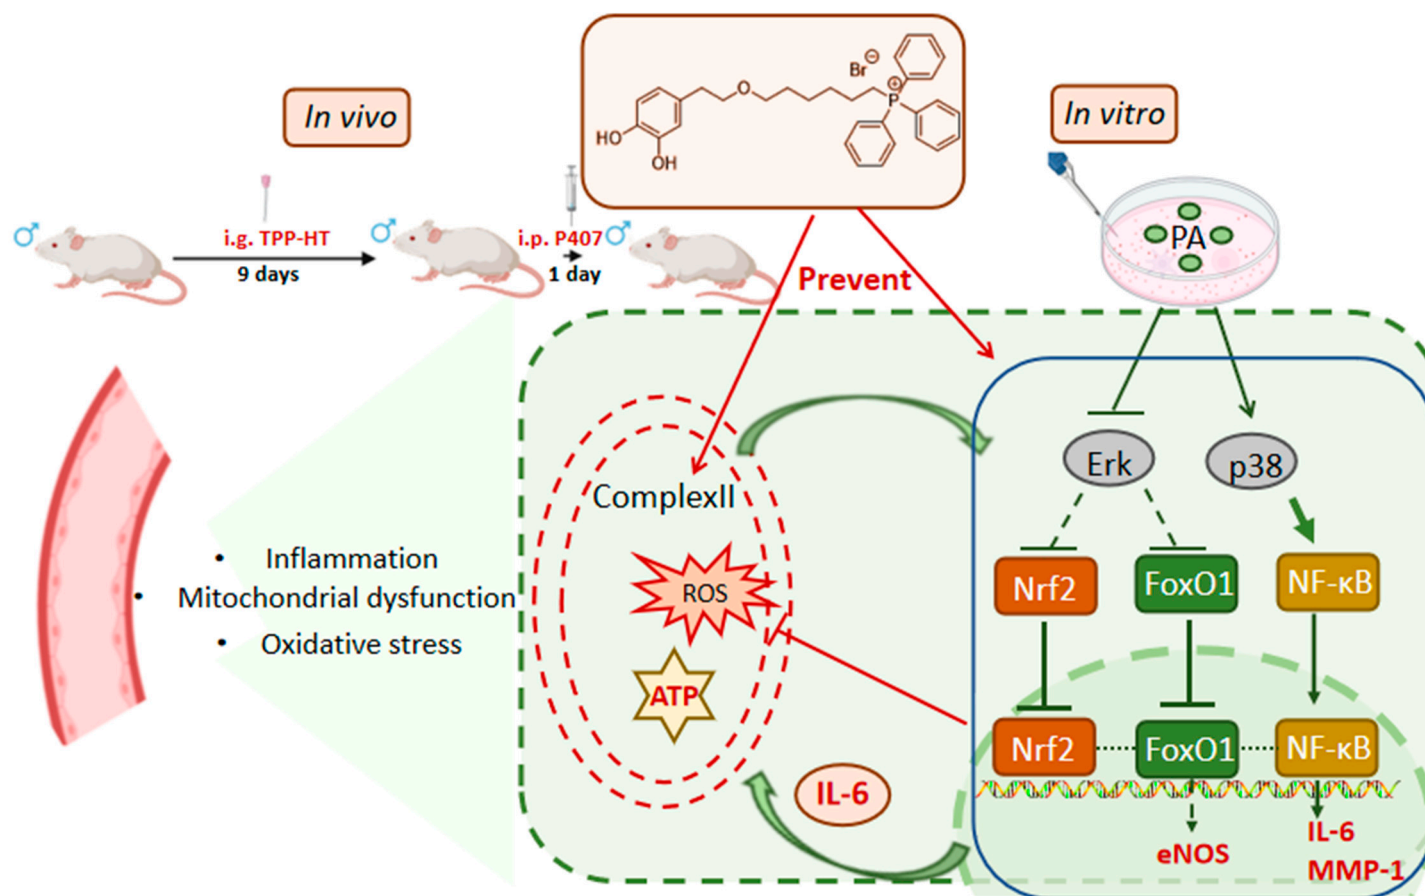

Figure S3 **Proposed model for the protective mechanism of TPP-HT.** TPP-HT activates FoxO1 and Nrf2 signaling pathway, also may directly promote Complex II (SDHB) expression, thereby prevents ROS generation, blocks inflammatory response by inhibiting p38/NFκB signaling pathway and eventually attenuates PA-induced endothelial injury.
